# Supplementary material for: The human oral cavity microbiota composition during acute tonsillitis: a cross-sectional survey
Source: Springer Nature journal article supplement (doi:10.1186/s12903-019-0956-5), 2019-12-01
Supplement: MOESM2 [file 17473880]

研究編號: GHQ-

填寫日期:  (年)  (月)  (日)

## 健康狀況調查

感謝您參與我們的研究，  
你所提供的資料有助我們加深了解人類健康。

填寫本問卷須要大約 30 分鐘。

你所提供的資料將會絕對保密，  
並只作研究用途。

中文大學醫學院微生物學系

## A. 個人資料

A1. 在港居住   年

A2. 性別: <sup>1</sup> 男 <sup>2</sup> 女

A3. 族裔:

<sup>1</sup> 華人(  漢族/  其他: \_\_\_\_\_ )

↳ 請註明籍貫: \_\_\_\_\_

<sup>2</sup> 非華人

A4. a. 出生日期:  (年)/  (月)/  (日)

b. 出生方式: <sup>1</sup> 開刀 <sup>2</sup> 順產(自然分娩) <sup>3</sup> 不清楚

c. 出生後首三個月, 主要餵哺方式:

<sup>1</sup> 母乳 <sup>2</sup> 嬰兒配方奶粉 <sup>3</sup> 不清楚

A5. 婚姻狀態:

<sup>1</sup> 未婚 <sup>2</sup> 已婚 <sup>3</sup> 分居

<sup>4</sup> 離婚 <sup>5</sup> 同居 <sup>6</sup> 喪偶

A6. 教育經歷:

<sup>1</sup> 小學或以下 <sup>2</sup> 初中 <sup>3</sup> 高中

<sup>4</sup> 預科或文憑 <sup>5</sup> 大專/大學或以上

A7. 工作狀態:

<sup>1</sup> 學生 <sup>2</sup> 待業 <sup>3</sup> 家庭主婦 <sup>4</sup> 退休

<sup>5</sup> 全職 <sup>6</sup> 兼職

A8. 請列出您所從事過的職業(我們並不需要一個完整的簡歷, 而是你工作大概類型)

| 大概時間(例如 20-25 歲) | 工作性質(例如教師、農民) |
|------------------|---------------|
|                  |               |
|                  |               |
|                  |               |
|                  |               |

A9. 現時一同居住的人數(不包括自己)<sup>1</sup>: \_\_\_\_\_ 人, 請註明:

<sup>2</sup> 祖父母: \_\_\_\_\_ 名 <sup>3</sup> 父母: \_\_\_\_\_ 名 <sup>4</sup> 兄弟姐妹: \_\_\_\_\_ 名 <sup>5</sup> 子女: \_\_\_\_\_ 名

<sup>6</sup> 孫: \_\_\_\_\_ 名 <sup>7</sup> 伴侶: \_\_\_\_\_ 名 <sup>8</sup> 朋友/同學: \_\_\_\_\_ 名 <sup>9</sup> 家傭: \_\_\_\_\_ 名



A14. 有沒有吸煙的習慣?

<sup>1</sup> 有, 每天吸煙支數? \_\_\_\_\_ 支; 開始吸煙年歲: \_\_\_\_\_ 歲

<sup>2</sup> 曾經有, 但已戒掉 (戒掉多久? \_\_\_\_\_ 年)

<sup>3</sup> 從來沒有

A15. 同住成員有沒有吸煙的習慣?

<sup>1</sup> 有, 同住多久? \_\_\_\_\_ 年

<sup>2</sup> 曾經有, 但已分開居住 (同住多久? \_\_\_\_\_ 年, 分開居住多久? \_\_\_\_\_ 年)

<sup>3</sup> 從來沒有

A16. 請問你有沒有飲酒習慣?

<sup>1</sup> 有

<sup>1</sup> 每月飲少過一次 (如在特別日子/場合才飲)

<sup>2</sup> 每月 1-3 次

<sup>3</sup> 每星期 1-3 次

<sup>4</sup> 每星期 4-5 次

<sup>5</sup> 差不多每天

<sup>2</sup> 曾經有, 但已戒掉 (戒掉多久? \_\_\_\_\_)

<sup>3</sup> 從來沒有

A17. 有沒有喝奶茶的習慣?

<sup>1</sup> 有 (喝了多久? \_\_\_\_\_ 年)

如有, 有多頻繁?

<sup>1</sup> 每月飲少過一次

<sup>2</sup> 每月 1-3 次

<sup>3</sup> 每星期 1-3 次

<sup>4</sup> 每星期 4-5 次

<sup>5</sup> 差不多每天

<sup>2</sup> 曾經有, 但現在沒有 (戒掉多久? \_\_\_\_\_ 年)

<sup>3</sup> 從來沒有

A18. 有沒有喝清茶的習慣? (不包括奶茶)

<sup>1</sup> 有 (喝了多久? \_\_\_\_\_ 年)

a. 有多頻繁?

<sup>1</sup> 每月飲少過一次

<sup>2</sup> 每月 1-3 次

<sup>3</sup> 每星期 1-3 次

<sup>4</sup> 每星期 4-5 次

<sup>5</sup> 差不多每天

b. 通常喝什麼茶?

<sup>1</sup> 紅茶

<sup>2</sup> 綠茶

<sup>3</sup> 不清楚

<sup>4</sup> 其他(請註明: \_\_\_\_\_)

<sup>2</sup> 曾經有, 但現在沒有 (戒掉多久? \_\_\_\_\_ 年)

<sup>3</sup> 從來沒有

A19. 有沒有喝咖啡的習慣?

<sup>1</sup> 有 (喝了多久? \_\_\_\_\_ 年)

a. 有多頻繁?

<sup>1</sup> 每月飲少過一次

<sup>2</sup> 每月 1-3 次

<sup>3</sup> 每星期 1-3 次

<sup>4</sup> 每星期 4-5 次

<sup>5</sup> 差不多每天

b. 通常喝哪一種咖啡?

<sup>1</sup> 含咖啡因咖啡

<sup>2</sup> 沒有咖啡因的咖啡

<sup>3</sup> 兩者都喝

<sup>2</sup> 曾經有, 但現在沒有 (戒掉多久? \_\_\_\_\_)

<sup>3</sup> 從來沒有
